# Supplementary material
Source: publisher figshare collection journal article supplement (https://acs.figshare.com/ndownloader/files/22616222)
Supplement: Supplementary file 1 [file 22616222]

# SUPPORTING INFORMATION

## CycloBranch 2: Molecular Formula Annotations Applied to imzML Data Sets in Bimodal Fusion and LC-MS Data Files

Jiří Novák, Anton Škríba, Vladimír Havlíček\*

*Institute of Microbiology of the Czech Academy of Sciences, Videnska 1083, 142 20 Prague 4, Czech Republic, e-mail: vlhavlic@biomed.cas.cz*

### Table of contents:

|                                                                                                                                                                   |     |
|-------------------------------------------------------------------------------------------------------------------------------------------------------------------|-----|
| <b>Figure S1.</b> The basic algorithm used to generate the combinations of elements.....                                                                          | S2  |
| <b>Figure S2.</b> CycloBranch's settings dialog configured for analysis of LC-MS data using the database-free approach.....                                       | S3  |
| <b>Figure S3.</b> CycloBranch's settings dialog configured for analysis of MSI data using the database-free approach.....                                         | S4  |
| <b>Figure S4.</b> CycloBranch's settings dialog configured for the analysis of the fragment ion mass spectrum of pyochelin .....                                  | S5  |
| <b>Figure S5.</b> Analysis of spectrum containing EDTA with zinc.....                                                                                             | S6  |
| <b>Figure S6.</b> Analysis of spectrum containing EDTA with nickel.....                                                                                           | S7  |
| <b>Figure S7.</b> Analysis of spectrum containing EDTA with copper.....                                                                                           | S8  |
| <b>Figure S8.</b> Fusion of identified compounds with an optical image.....                                                                                       | S9  |
| <b>Figure S9.</b> Dissecting $^{41}\text{K}$ , $^{18}\text{O}$ and $^{13}\text{C}_2$ (inset) from the $[\text{M}+\text{K}+2]^+$ ion of FOXE at FWHM = 0.001 ..... | S10 |
| <b>Figure S10.</b> Structure of pyochelin and formulas of fragment ions suggested by CycloBranch.....                                                             | S11 |
| <b>Table S1.</b> Number of generated combinations of elements for different $m/z$ ranges.....                                                                     | S12 |
| <b>Table S2.</b> Time required to generate combinations of elements for different $m/z$ ranges.....                                                               | S13 |
| Comments on Conventional Mass Spectra Settings.....                                                                                                               | S14 |
| Comments on Standard Product Ion Mass Spectra Settings.....                                                                                                       | S15 |

```

bool getcombination() {
    pos = 0;
    flag = 0;
    do {
        combination[pos]++;
        if (combination[pos] <= N) {
            if (flag > 0) {
                for (i = pos - 1; i >= 0; i--) {
                    combination[i] = combination[pos];
                }
            }
            return true;
        }
        else {
            flag = 1;
            pos++;
        }
    } while (pos < P);
    return false;
}

```

Example:  
N = 4 ... number of items  
P = 3 ... maximum number of combined items  
combination = 000 ... input/output vector of length P

Output after 34 calls:

|     |     |
|-----|-----|
| 100 | 411 |
| 200 | 221 |
| 300 | 321 |
| 400 | 421 |
| 110 | 331 |
| 210 | 431 |
| 310 | 441 |
| 410 | 222 |
| 220 | 322 |
| 320 | 422 |
| 420 | 332 |
| 330 | 432 |
| 430 | 442 |
| 440 | 333 |
| 111 | 433 |
| 211 | 443 |
| 311 | 444 |

**Figure S1.** The basic algorithm used to generate the combinations of elements with repetitions from an input list of  $N$  elements (e.g., 1 = ‘H’, 2 = ‘C’, 3 = ‘N’, 4 = ‘O’) is shown. The maximum number of elements in a formula is limited by  $P$ . We used  $P = 200$ , if not stated otherwise. In the real implementation, two further optimizations were used. The first was based on the idea that the input list of elements was sorted by mass. For example, if the cumulative mass corresponding to the combination 411 (OHH) exceeded a user-defined upper mass limit, the combinations 511, 611, etc. were not generated (for  $N \geq 6$ ). Since CycloBranch keeps statistics about the number of elements in a currently computed combination and since the user can define the maximum number of occurrences of any element, a similar approach was used to prune out unnecessary combinations of elements in the second case.

Settings...

Search

Mode: Compound Search - MS, LC-MS, MSI

Maximum Number of Threads: Compound Search - MS, LC-MS, MSI

Experimental Spectrum/Spectra

Peptide Type: Cyclic

File: bno\_03062019/H\_tto1\_profile\_BB7\_01\_4492.d/analysis.baf Select

Scan no.: 1

Precursor m/z Ratio: 0,000000

Precursor Ion Adduct:

Charge: 2

Precursor m/z Error Tolerance: 1,000 ppm

m/z Error Tolerance: 2,000 ppm

Minimum Threshold of Relative Intensity: 3,000 %

Minimum Threshold of Absolute Intensity: 100000

m/z Ratio: minimum: 650,000 maximum: 1400,000

FWHM: 0,050000 Da

Database of Building Blocks

Building Blocks Database File:  Select

Maximum Number of Combined Blocks: start: 1 middle: 1 end: 1

Incomplete Paths in De Novo Graph: remove (speed up the search)

Maximum Cumulative Mass of Blocks: 0,000

N-/C-terminal Modifications File:  Select

Miscellaneous

Disable Precursor Mass Filter: ☐

Internal Fragments: ☐

Enable Scrambling: ☐

Cyclic N-terminus: ☐

Cyclic C-terminus: ☐

Regular Order of Ketide Blocks: ☐

Theoretical Spectrum/Spectra

Sequence/Compound Database File: /siderophores/709\_siderophores\_and\_secondary\_metabolites.txt Select

Score Type: Number of y-ions

Maximum Number of Reported Sequence Candidates: 1000

Peptide Sequence Tag:

Ion Types: [M+Na]<sup>+</sup> [M+K]<sup>+</sup> [M+H]<sup>+</sup> [M+Na-2H]<sup>-</sup> [M+K-2H]<sup>-</sup> [M+Fe-2H]<sup>+</sup> Select All Clear All Reset

Neutral Losses / Chemical Elements: H C O N S:1 P:1 Select All Clear All Add Remove Default HCON

Maximum Number of Combined Losses/Elements: 180

Report Unmatched Theoretical Peaks: ☐

Generate Full Isotope Patterns: ☒

Minimum Number of Isotopic Peaks: 4

Minimum Number of Spectra: 4

Minimum Number of Ion Types: 1

Basic Formula Check: ☒

Advanced Formula Check: ☒

N/O Ratio Check: ☒

Isotope m/z Tolerance: 0,000 ppm

Isotope Intensity Tolerance: 10,000 %

Searched Sequence/Compound

Sequence:  Edit

Modifications: N-terminal C-terminal Branch

Formula:

OK Cancel Apply Load Save 'example1\_jcms.in' Save As...

**Figure S2.** CycloBranch's settings dialog configured for analysis of LC-MS data using the database-free approach.

Settings...

Search

Mode: Compound Search - MS, LC-MS, MSI

Maximum Number of Threads: 1

Experimental Spectrum/Spectra

Peptide Type: Cyclic

File: D:/raw\_data/MSI/ITO14\_new\_reduced.ms2ML Select

Scan no.: 1

Precursor m/z Ratio: 0.000000

Precursor Ion Adduct:

Charge: 1

Precursor m/z Error Tolerance: 1.000 ppm

m/z Error Tolerance: 2.000 ppm

Minimum Threshold of Relative Intensity: 0.500 %

Minimum Threshold of Absolute Intensity: 0

m/z Ratio: minimum: 350.000 maximum: 950.000

FWHM: 0.001000 Da

Database of Building Blocks

Building Blocks Database File:  Select

Maximum Number of Combined Blocks: start: 1 middle: 1 end: 1

Incomplete Paths in De Novo Graph: remove (speed up the search)

Maximum Cumulative Mass of Blocks: 0.000

N-/C-terminal Modifications File:  Select

Miscellaneous

Disable Precursor Mass Filter: ☐

Internal Fragments: ☐

Enable Scrambling: ☐

Cyclic N-terminus: ☐

Cyclic C-terminus: ☐

Regular Order of Ketide Blocks: ☐

Theoretical Spectrum/Spectra

Sequence/Compound Database File: /siderophores/709\_siderophores\_and\_secondary\_metabolites.txt Select

Score Type: Number of y-ions

Maximum Number of Reported Sequence Candidates: 1000

Peptide Sequence Tag:

Ion Types:

[M+Na]<sup>+</sup>  
[M+K]<sup>+</sup>  
[M+H]<sup>+</sup>  
[M+Na-2H]<sup>+</sup>  
[M+K-2H]<sup>+</sup>  
[M+Fe-2H]<sup>+</sup>

Select All  
Clear All  
Reset

Neutral Losses / Chemical Elements:

H  
C  
O  
N  
Si2  
P:1

Select All  
Clear All  
Add  
Remove  
Default  
HCON

Maximum Number of Combined Losses/Elements: 150

Report Unmatched Theoretical Peaks: ☐

Generate Full Isotope Patterns: ☒

Minimum Number of Isotopic Peaks: 3

Minimum Number of Spectra: 50

Minimum Number of Ion Types: 1

Basic Formula Check: ☒

Advanced Formula Check: ☒

N/O Ratio Check: ☒

Isotope m/z Tolerance: 2.000 ppm

Isotope Intensity Tolerance: 5.000 %

Searched Sequence/Compound

Sequence:  Edit

Modifications: N-terminal C-terminal Branch

Formula:

OK Cancel Apply Load Save 'example2\_msi.in' Save As...

**Figure S3.** CycloBranch's settings dialog configured for analysis of MSI data using the database-free approach.

Settings...

Search

Mode: Compare Peaklist(s) with Spectrum of Searched Sequence - MS/MS

Maximum Number of Threads: 1

Experimental Spectrum/Spectra

Peptide Type: Other

File: OXE/PCH\_c325w1e15\_UHR\_onlinecal\_000001.d/analysis.baf Select

Scan no.: 1

Precursor m/z Ratio: 325,067330

Precursor Ion Adduct:

Charge: 1

Precursor m/z Error Tolerance: 2,000 ppm

m/z Error Tolerance: 2,000 ppm

Minimum Threshold of Relative Intensity: 5,000 %

Minimum Threshold of Absolute Intensity: 0

m/z Ratio: minimum: 100,000 maximum: 0,000

FWHM: 0,001000 Da

Database of Building Blocks

Building Blocks Database File: BridDatabases/Inhouse\_siderophores\_blocks.txt Select

Maximum Number of Combined Blocks: start: 2 middle: 2 end: 2

Incomplete Paths in De Novo Graph: remove (speed up the search)

Maximum Cumulative Mass of Blocks: 0,000

N-/C-terminal Modifications File:  Select

Miscellaneous

Disable Precursor Mass Filter: ☐

Internal Fragments: ☐

Enable Scrambling: ☐

Cyclic N-terminus: ☐

Cyclic C-terminus: ☐

Regular Order of Ketide Blocks: ☐

Theoretical Spectrum/Spectra

Sequence/Compound Database File:  Select

Score Type: Sum of relative intensities of matched peaks

Maximum Number of Reported Sequence Candidates: 100

Peptide Sequence Tag:

Ion Types:

Neutral Losses / Chemical Elements:

Maximum Number of Combined Losses/Elements: 38

Report Unmatched Theoretical Peaks: ☐

Generate Full Isotope Patterns: ☒

Minimum Number of Isotopic Peaks: 1

Minimum Number of Spectra: 1

Minimum Number of Ion Types: 1

Basic Formula Check: ☒

Advanced Formula Check: ☒

N/O Ratio Check: ☒

Isotope m/z Tolerance: 0,000 ppm

Isotope Intensity Tolerance: 10,000 %

Searched Sequence/Compound

Sequence:  Edit

Modifications: N-terminal C-terminal Branch

Formula: C14H16N2O3S2

OK Cancel Apply Load Save 'example3\_msms.in' Save As...

**Figure S4.** CycloBranch's settings dialog configured for the analysis of the fragment ion mass spectrum of pyochelin  $[C_{14}H_{16}N_2O_3S_2+H]^+$ .

| Pattern Type | Theoretical m/z | Theoretical Intensity [%] | Experimental m/z | Relative Intensity [%] | Absolute Intensity | Error [ppm] | Summary Formula                                                               | Name          |
|--------------|-----------------|---------------------------|------------------|------------------------|--------------------|-------------|-------------------------------------------------------------------------------|---------------|
| [M+Zn-H] 1+  | 420.957276      | 100.000000                | 420.957267       | 100.000000             | 324407327          | -0.020882   | 1+ C10 H12 N2 Na3 O8 Zn ;                                                     | C10H13N2O8Na3 |
| [M+Zn-H] 1+  | 421.954311      | 0.738718                  | 421.954333       | 0.806750               | 2617156            | 0.051775    | 1+ C10 H12 15N N Na3 O8 Zn ;                                                  | C10H13N2O8Na3 |
| [M+Zn-H] 1+  | 421.960554      | 11.120469                 | 421.960594       | 10.762039              | 34912843           | -0.142997   | 1+ 13C 9 H12 N2 Na3 O8 Zn [97.26%]; 1+ C10 H12 N2 Na3 17O O7 Zn [2.74%];      | C10H13N2O8Na3 |
| [M+Zn-H] 1+  | 422.954164      | 57.371993                 | 422.954085       | 62.201094              | 201784907          | -0.187223   | 1+ C10 H12 N2 Na3 O8 66Zn ;                                                   | C10H13N2O8Na3 |
| [M+Zn-H] 1+  | 422.961521      | 1.643995                  | 422.961448       | 1.585230               | 5142601            | -0.172989   | 1+ C10 H12 N2 Na3 18O O7 Zn ;                                                 | C10H13N2O8Na3 |
| [M+Zn-H] 1+  | 422.963986      | 0.526410                  | 422.963767       | 0.547469               | 1776029            | -0.516137   | 1+ 13C2 C8 H12 N2 Na3 O8 Zn ;                                                 | C10H13N2O8Na3 |
| [M+Zn-H] 1+  | 423.951199      | 0.423818                  | 423.951187       | 0.477537               | 1549165            | -0.026753   | 1+ C10 H12 15N N Na3 O8 66Zn ;                                                | C10H13N2O8Na3 |
| [M+Zn-H] 1+  | 423.955259      | 8.431010                  | 423.955181       | 9.269733               | 30071694           | -0.183443   | 1+ C10 H12 N2 Na3 O8 67Zn ;                                                   | C10H13N2O8Na3 |
| [M+Zn-H] 1+  | 423.957542      | 6.380035                  | 423.957376       | 6.890778               | 22354188           | -0.393516   | 1+ 13C 9 H12 N2 Na3 O8 66Zn [97.26%]; 1+ C10 H12 N2 Na3 17O O7 66Zn [2.74%];  | C10H13N2O8Na3 |
| [M+Zn-H] 1+  | 423.964876      | 0.177810                  | 423.964743       | 0.166790               | 541080             | -0.314116   | 1+ 13C 9 H12 N2 Na3 18O O7 Zn ;                                               | C10H13N2O8Na3 |
| [M+Zn-H] 1+  | 424.952976      | 38.556447                 | 424.952813       | 44.647402              | 144839444          | -0.382861   | 1+ C10 H12 N2 Na3 O8 68Zn ;                                                   | C10H13N2O8Na3 |
| [M+Zn-H] 1+  | 424.958510      | 1.855068                  | 424.958340       | 2.007796               | 6513436            | -0.398617   | 1+ C10 H12 N2 Na3 18O O7 66Zn [50.84%]; 1+ 13C 9 H12 N2 Na3 O8 67Zn [49.16%]; | C10H13N2O8Na3 |
| [M+Zn-H] 1+  | 425.950011      | 0.284824                  | 425.949936       | 0.304414               | 987542             | -0.174500   | 1+ C10 H12 15N N Na3 O8 68Zn ;                                                | C10H13N2O8Na3 |
| [M+Zn-H] 1+  | 425.956354      | 4.287658                  | 425.956124       | 4.685914               | 15201447           | -0.541353   | 1+ 13C 9 H12 N2 Na3 O8 68Zn [97.26%]; 1+ C10 H12 N2 Na3 17O O7 68Zn [2.74%];  | C10H13N2O8Na3 |
| [M+Zn-H] 1+  | 425.961764      | 0.102013                  | 425.961570       | 0.190501               | 618000             | -0.454861   | 1+ 13C 9 H12 N2 Na3 18O O7 66Zn ;                                             | C10H13N2O8Na3 |
| [M+Zn-H] 1+  | 426.953455      | 1.274933                  | 426.953201       | 1.544104               | 5009185            | -0.595509   | 1+ C10 H12 N2 Na3 O8 70Zn ;                                                   | C10H13N2O8Na3 |
| [M+Zn-H] 1+  | 426.957221      | 0.633866                  | 426.957002       | 0.762328               | 2473048            | -0.514075   | 1+ C10 H12 N2 Na3 18O O7 68Zn ;                                               | C10H13N2O8Na3 |
| [M+Zn-H] 1+  | 426.959686      | 0.202965                  | 426.959302       | 0.265221               | 860395             | -0.898909   | 1+ 13C2 C8 H12 N2 Na3 O8 68Zn ;                                               | C10H13N2O8Na3 |
| [M+Zn-H] 1+  | 427.956810      | 0.137893                  | 427.956475       | 0.132425               | 429596             | -0.782076   | 1+ 13C 9 H12 N2 Na3 O8 70Zn ;                                                 | C10H13N2O8Na3 |

S6

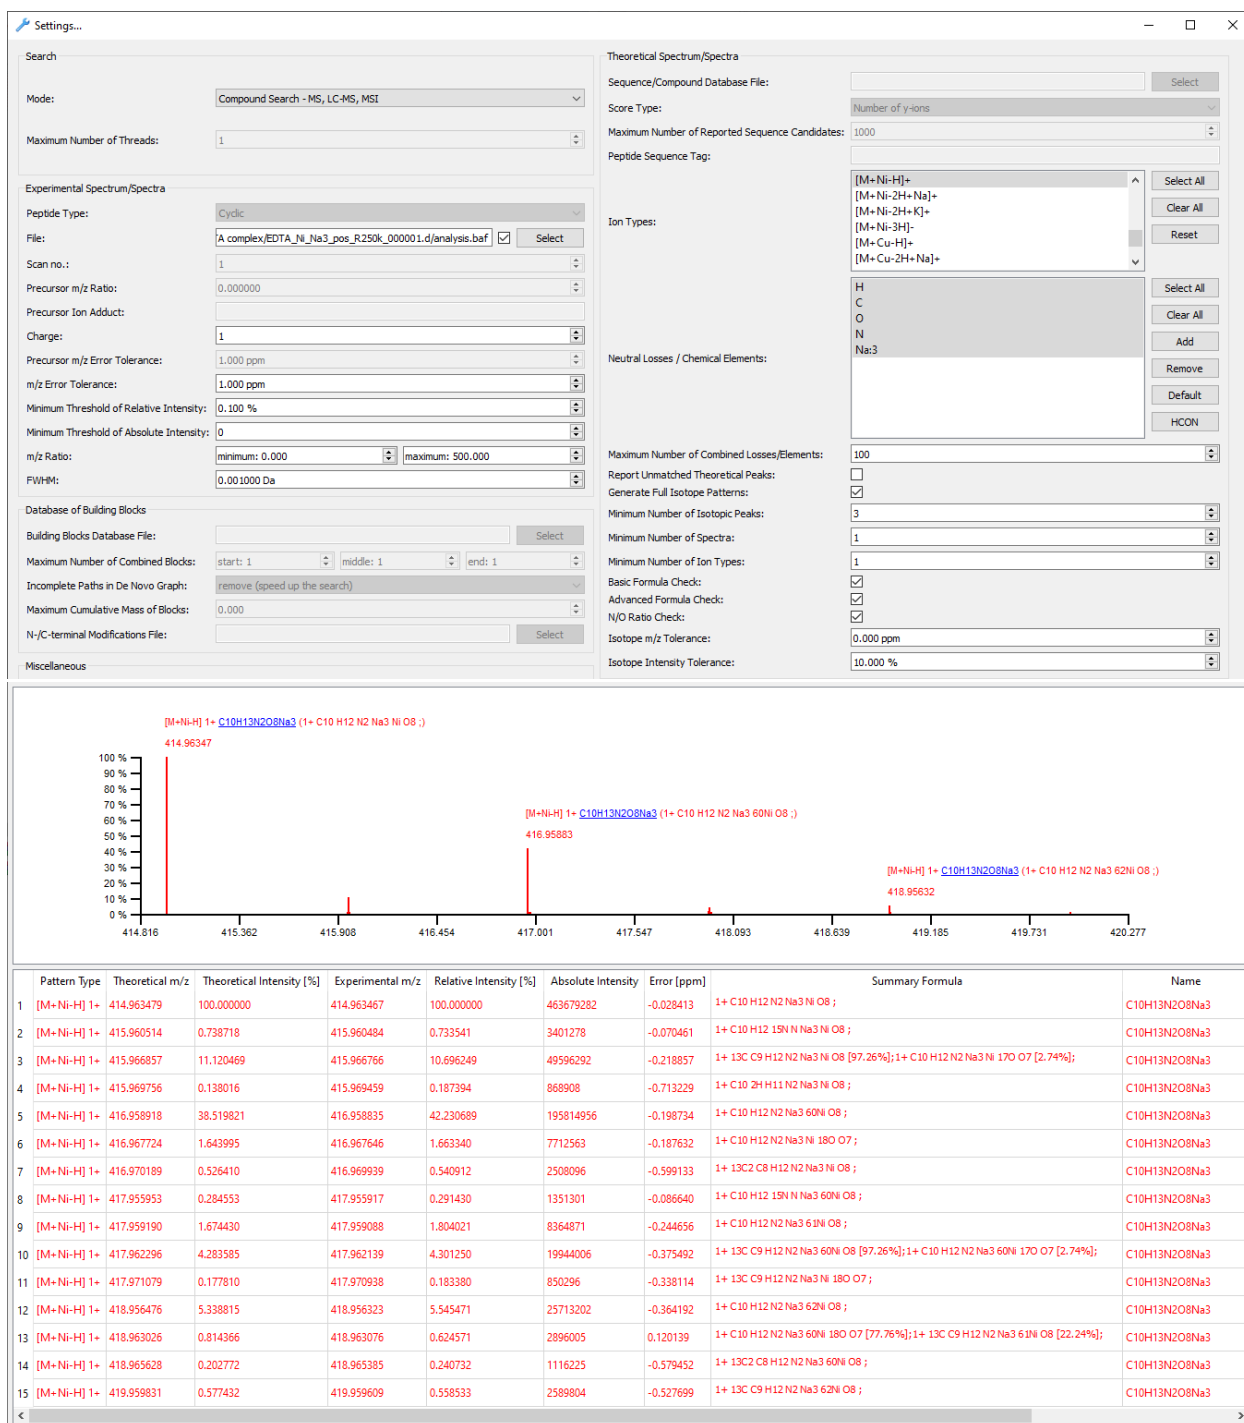

**Figure S6.** Analysis of spectrum containing EDTA with nickel. CycloBranch's settings dialog configured for the analysis of direct infusion ESI-MS containing EDTA with three atoms of sodium and one atom of nickel (top); and fine isotope structure annotated using the database-free approach (bottom). The spectrum was collected in positive ion mode.

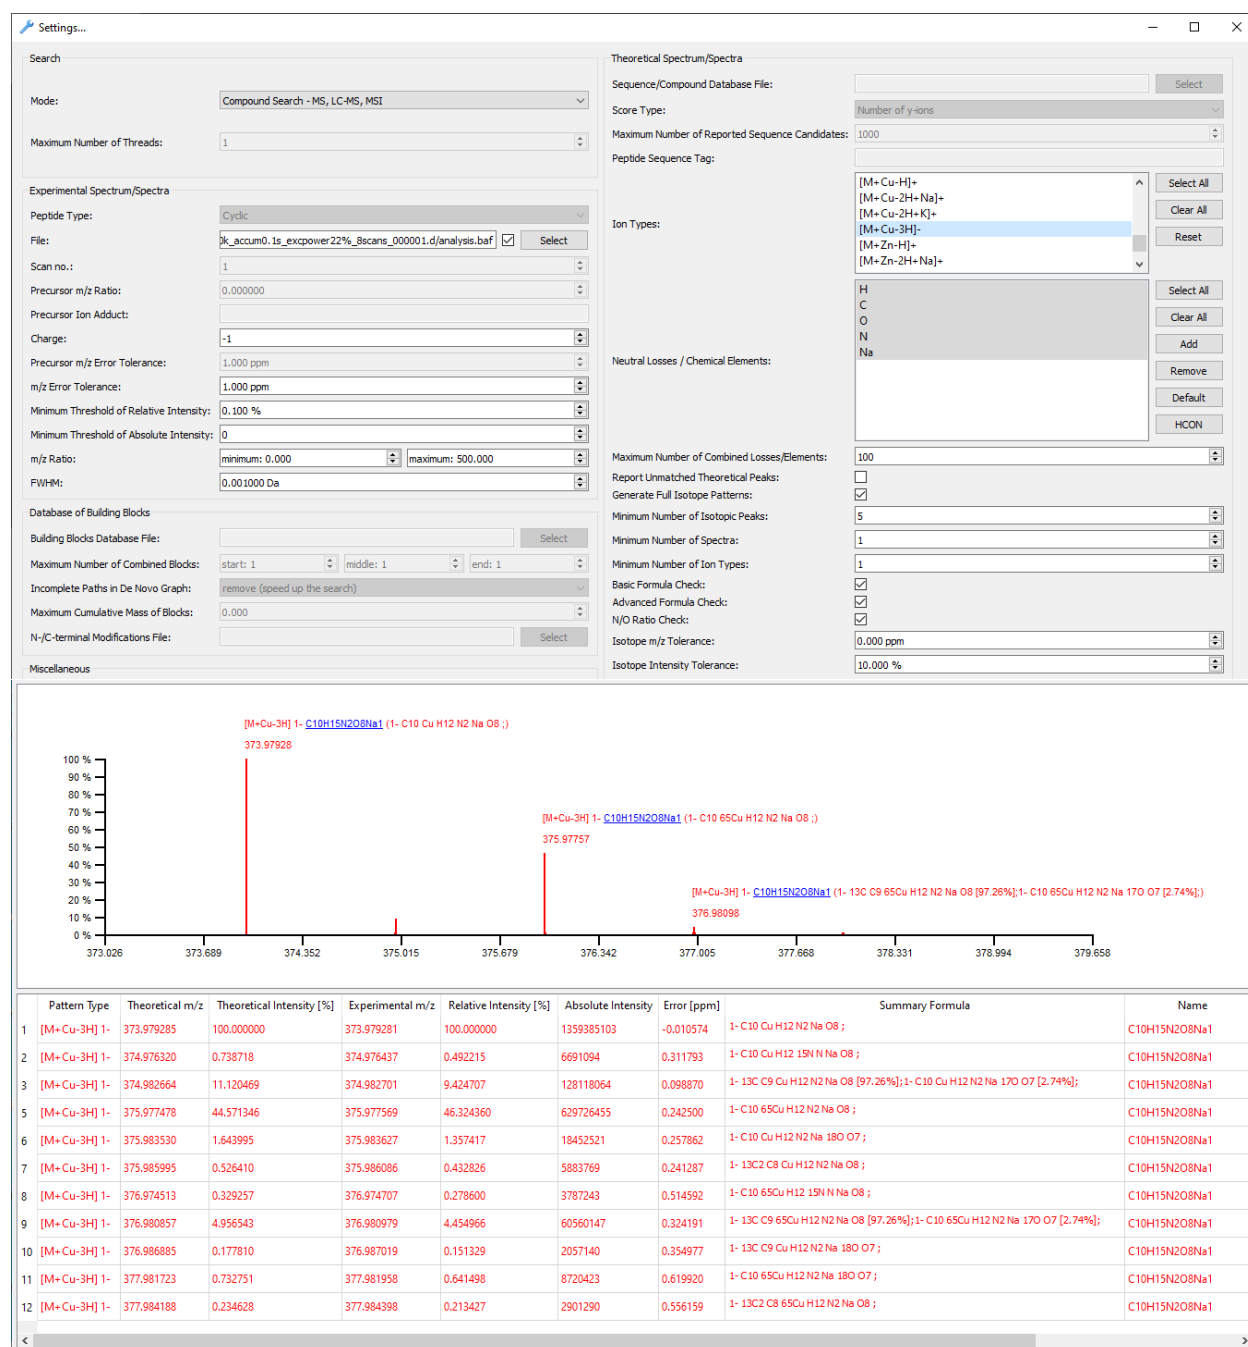

**Figure S7.** Analysis of spectrum containing EDTA with copper. CycloBranch's settings dialog configured for the analysis of direct infusion ESI-MS containing EDTA with one atom of sodium and one atom of copper (top); and fine isotope structure annotated using the database-free approach (bottom). The spectrum was collected in negative ion mode.



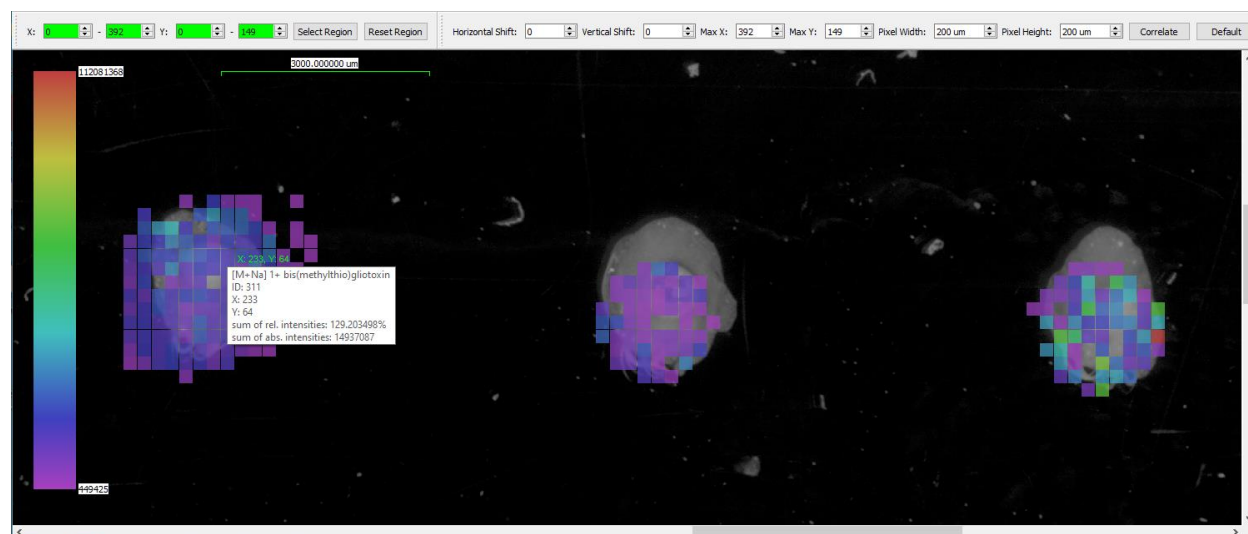

**Figure S8.** Fusion of identified compounds with an optical image. From left to right—droplet-generated circles of bmGTX ( $[\text{C}_{15}\text{H}_{20}\text{N}_2\text{O}_4\text{S}_2+\text{Na}]^+$ ,  $m/z$  379.07567), FOXE ( $[\text{C}_{27}\text{H}_{48}\text{N}_6\text{O}_9+\text{K}]^+$ ,  $m/z$  639.31144), and TAFC ( $[\text{C}_{39}\text{H}_{60}\text{N}_6\text{O}_{15}+\text{Fe}-2\text{H}]^+$ ,  $m/z$  906.33041).

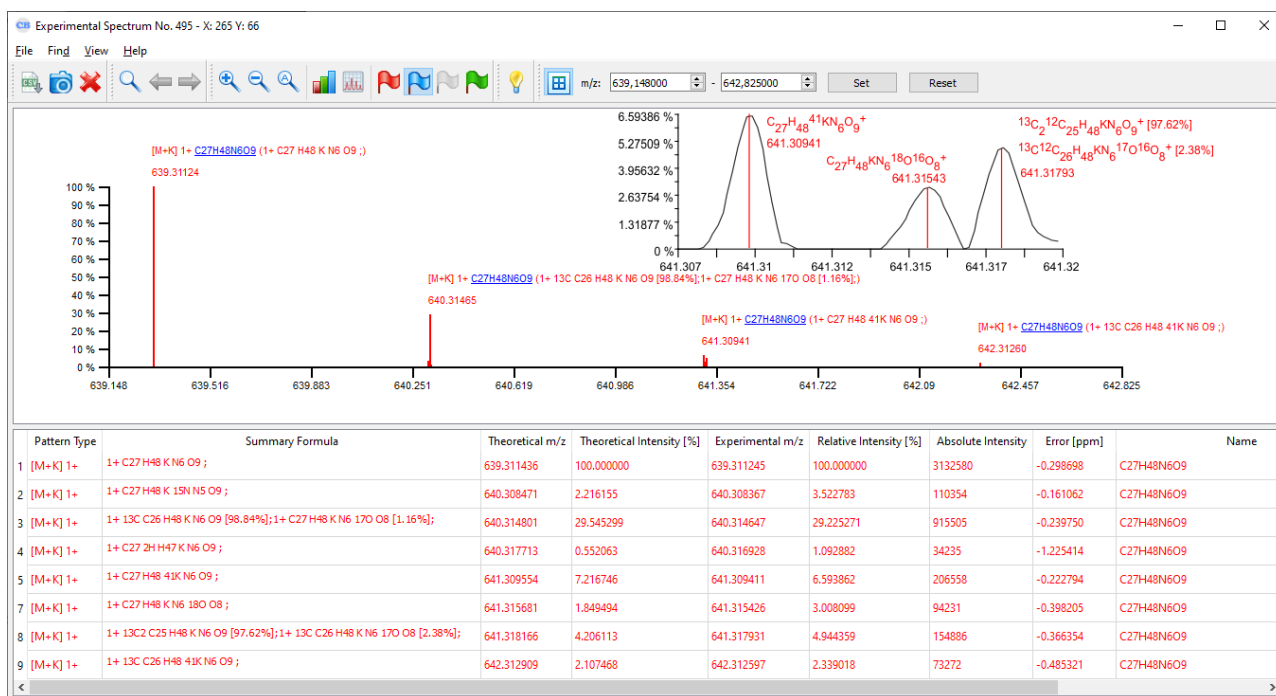

**Figure S9.** Dissecting  $^{41}\text{K}$ ,  $^{18}\text{O}$  and  $^{13}\text{C}_2$  (inset) from the  $[\text{M}+\text{K}+2]^+$  ion of FOXE at FWHM = 0.001.

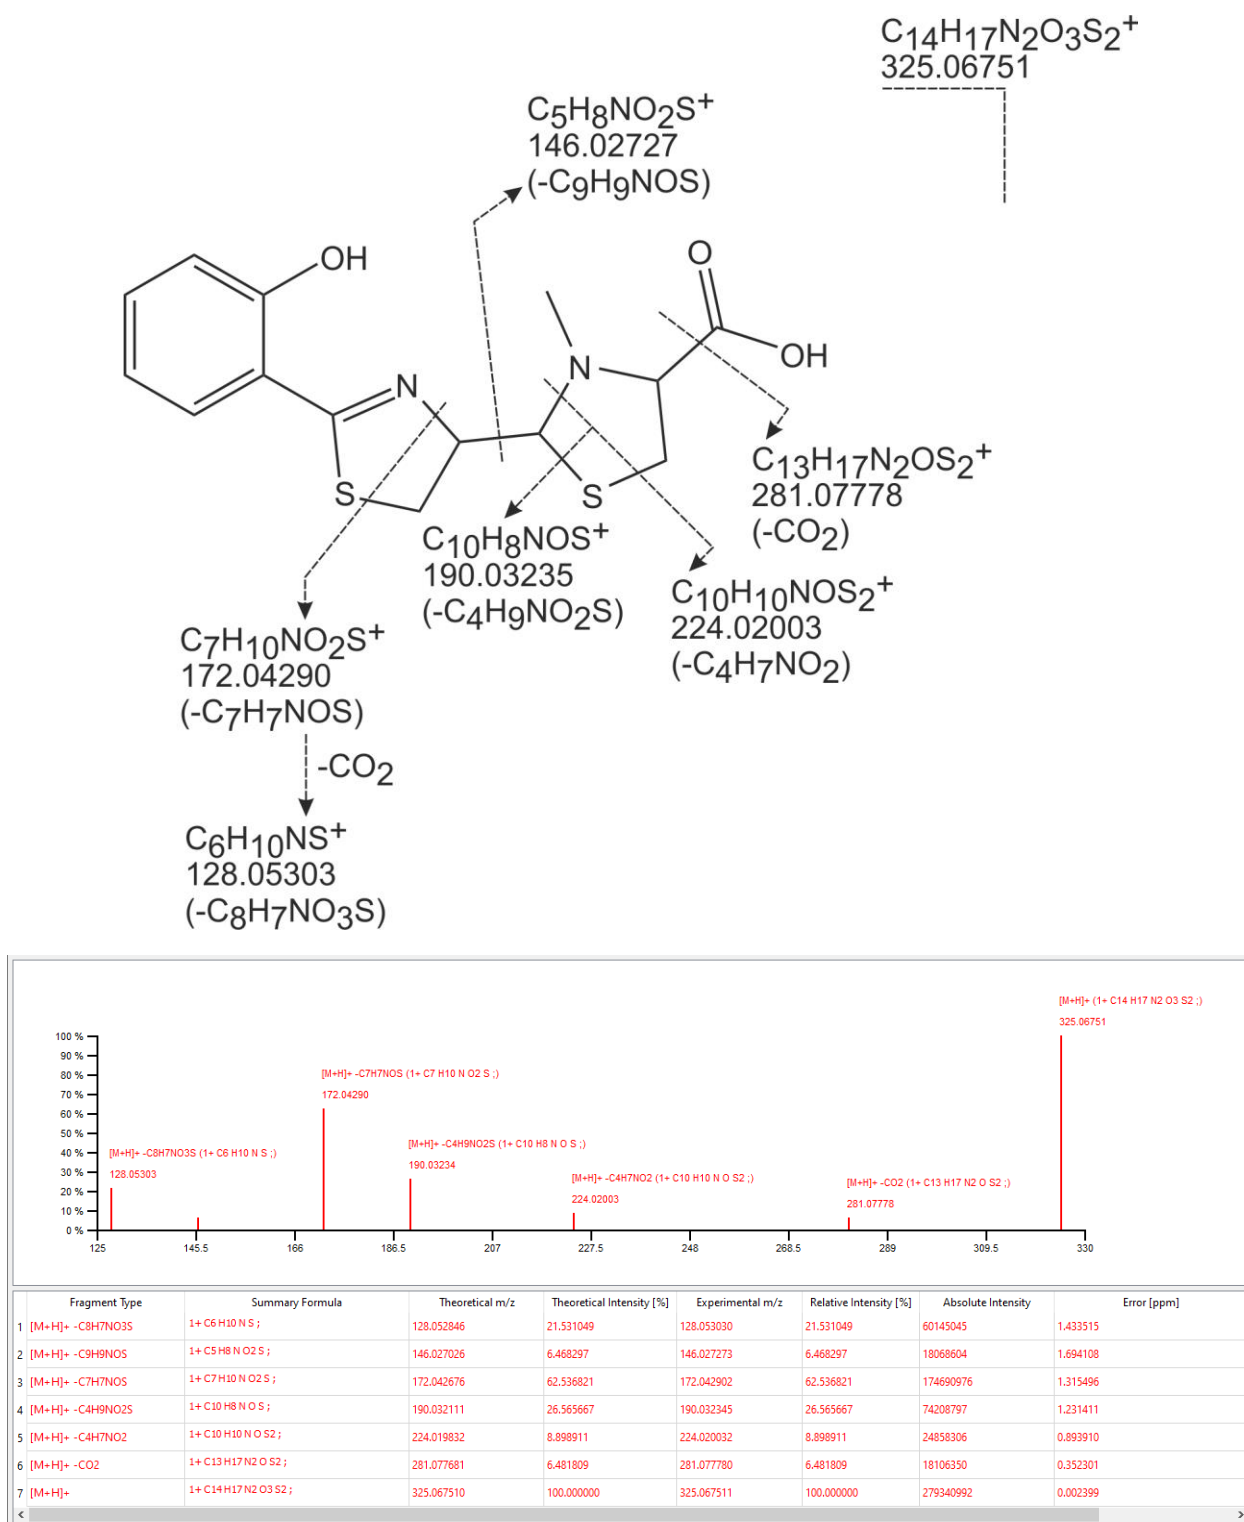

**Figure S10.** Structure of pyochelin and formulas of fragment ions suggested by CycloBranch.

**Table S1.** Number of generated combinations of elements for different  $m/z$  ranges [All = no filtering was applied; Sen. = Senior's filtering rules were applied; Adv. = advanced filtering rules (including the N/O rule) were used]. The maximum number of elements in a formula was limited to 200. S:1 and P:1 indicate that only one occurrence of sulfur and phosphorus was allowed, respectively.

|                | $m/z \leq 500$ |           |         | $m/z \leq 1,000$ Da |             |           | $m/z \leq 2,000$ Da |               |            |
|----------------|----------------|-----------|---------|---------------------|-------------|-----------|---------------------|---------------|------------|
| Elements       | All            | Sen.      | Adv.    | All                 | Sen.        | Adv.      | All                 | Sen.          | Adv.       |
| HCON           | 934,192        | 120,383   | 29,959  | 8,101,535           | 1,730,838   | 399,894   | 46,132,961          | 17,758,042    | 3,331,530  |
| HCONS          | 3,757,914      | 620,212   | 122,476 | 65,355,150          | 16,723,250  | 2,962,328 | 796,949,136         | 352,440,391   | 29,991,863 |
| HCONS<br>P     | 13,306,477     | 2,496,101 | 308,917 | 444,850,486         | 121,964,934 | 8,596,749 | 11,113,584,055      | 5,140,835,916 | 82,784,488 |
| HCONS<br>:1    | 1,681,008      | 225,403   | 55,511  | 15,438,135          | 3,350,810   | 775,599   | 90,392,945          | 35,076,565    | 6,604,713  |
| HCONS<br>:1P:1 | 3,024,190      | 416,600   | 101,546 | 29,436,430          | 6,446,384   | 1,495,144 | 177,165,660         | 69,119,426    | 13,068,349 |

**Table S2.** Time required to generate combinations of elements for different  $m/z$  ranges [mm:ss] (MALDI-MS or direct infusion ESI).

|            | $m/z \leq 500$ Da |      |      | $m/z \leq 1,000$ Da |      |      | $m/z \leq 2,000$ Da |       |       |
|------------|-------------------|------|------|---------------------|------|------|---------------------|-------|-------|
| Elements   | All               | Sen. | Adv. | All                 | Sen. | Adv. | All                 | Sen.  | Adv.  |
| HCON       | 0:00              | 0:00 | 0:00 | 0:02                | 0:02 | 0:02 | 0:21                | 0:26  | 0:26  |
| HCONS      | 0:00              | 0:00 | 0:00 | 0:17                | 0:20 | 0:22 | 5:34                | 6:53  | 7:29  |
| HCONSP     | 0:02              | 0:02 | 0:02 | 1:27                | 1:47 | 2:06 | 52:05               | 69:38 | 86:24 |
| HCONS:1    | 0:00              | 0:00 | 0:00 | 0:07                | 0:07 | 0:08 | 2:03                | 2:09  | 2:15  |
| HCONS:1P:1 | 0:00              | 0:00 | 0:00 | 0:09                | 0:10 | 0:11 | 2:16                | 2:37  | 2:39  |

## Comments on Conventional Mass Spectra Settings:

Go to the CycloBranch's settings dialog (i.e., click on "Search" → "Settings" in the main window) and select the mode "Compound Search – MS, LC-MS, MSI". Define the minimum and maximum  $m/z$  ratios to limit the number of generated molecular formulas. The smaller the difference between the maximum and minimum  $m/z$  ratio is, the faster the search. Click on the HCON button to define the chemical elements H, C, O, and N in the field "Neutral Losses/Chemical Elements". Any custom element can be added. Heteroatoms such as Na or K need not be added if  $[M+Na]^+$  or  $[M+K]^+$  ions are searched. The heteroatoms used in the names of ion types are included automatically, and thus, computational time can be saved. Define the maximum number of atoms in a generated molecular formula (e.g., 150 or 180) in the field "Maximum Number of Combined Losses/Elements". The smaller the number is, the faster the search. See the sample configuration in **Figure S2** for LC-MS data and that in **Figure S3** for MSI data. The following options can be used to reduce the number of false-positive annotations of peaks:

- (1) Enable the option "Generate Full Isotope Patterns" and define the "Minimum Number of Isotopic Peaks" (e.g., 2). The theoretical isotopic patterns of compounds are generated and compared with the experimental spectrum. The "Minimum Number of Isotopic Peaks" (i.e., the minimum number of annotated peaks in an isotopic pattern used to report a given compound) is used to remove false-positive formulas.
- (2) If LC-MS data are processed, define the minimum number of consecutive scans in which an ion must be detected to be considered a match in the field "Minimum Number of Spectra" (e.g., 2). If MSI data are processed, the field determines the minimum number of single-pixel spectra that must be detected for every compound (e.g., 50). Note that this criterion can be combined with the "Minimum Number of Isotopic Peaks".
- (3) Define a minimum number of ions that must be matched to annotate a given compound. For example, if  $[M+H]^+$  and  $[M+Na]^+$  ions are selected, "Charge" = 2, and "Minimum Number of Ion Types" = 2, any pair of ions from the set of ions  $[M+H]^+$ ,  $[M+Na]^+$ ,  $[M+2H]^{2+}$ , and  $[M+Na+H]^{2+}$  must be matched, otherwise the formula is discarded. This option can be combined with the "Minimum Number of Isotopic Peaks" and "Minimum Number of Spectra". If MALDI-MS, direct infusion ESI-MS, and MSI data are processed, the ions must be detected in the same spectrum. If LC-MS data are processed, the ions may occur at different retention times, which is advantageous, especially if  $[M+H]^+$  and  $[M+Fe-2H]^+$  ions are searched.
- (4) Enable the option "Basic Formula Check" to discard formulas that do not meet Senior's rules.
- (5) Enable the option "Advanced Formula Check" to check the advanced filtering rules, as stated in the manuscript.
- (6) Enable the option "N/O Ratio Check" to remove formulas with a number of nitrogen atoms larger than the number of oxygen atoms.
- (7) Define "Isotope  $m/z$  Tolerance"  $\tau_{mz}$  in ppm.
- (8) Define "Isotope Intensity Tolerance"  $\tau_{int}$  in %.

## Comments on Standard Product Ion Mass Spectra Settings:

In the settings dialog, select the mode “Compare Peaklist(s) with Spectrum of Searched Sequence - MS/MS” and define the peptide type “Other”. In this mode, a single theoretical spectrum of a compound is compared with all experimental MS/MS spectra in an input file. The result of each comparison corresponds to one row in the output report. To perform the comparison, enter the molecular formula of a neutral compound into the field “Searched Sequence/Compound - Formula”. Define an input list of chemical elements in the field “Neutral Losses/Chemical Elements”. Click on the HCON button to use the default chemical elements and set the “Maximum Number of Combined Losses/Elements”. The upper bound on the number of combined elements is the number of elements in the formula corresponding to the precursor ion of the analyzed spectrum. For example, if the precursor corresponds to  $[C_{14}H_{16}N_2O_3S_2+H]^+$ , use a value of 38 or lower. Note that the maximum number of occurrences of single elements can be limited by a colon. For example, S:1 and P:1 can be used to allow only one occurrence of sulfur or phosphorus, respectively. Furthermore, define the minimum  $m/z$  ratio to be as large as possible (see the impact of  $m_{\min}$  below). See the sample configuration in **Figure S4**.

To perform a comparison of a single experimental MS/MS spectrum with multiple theoretical spectra (i.e., database compounds), select the mode “Compare Peaklist with Database – MS/MS” and define the peptide type as “Other”. In this case, the database of compounds “Sequence/Compound Database File” does not have to include the sequence of building blocks for any compound. The mandatory items for every compound in the database are only the name and molecular formula. Because the database may contain many compounds, a precursor mass filter is enabled by default. This filter can optionally be disabled by the checkbox “Disable Precursor Mass Filter” to make a comparison of the experimental spectrum with all compounds in the database. Note that the type of peptide in the database is ignored in this search mode, and all the compounds are used.

The algorithm for annotation of peaks in product ion mass spectra works a similar way like the algorithm for conventional mass spectra:

- (1) The input list of elements (e.g., H, C, O, and N) is loaded, and combinations of elements are generated. The number of generated combinations is limited by the maximum number of elements in a formula according to the “Maximum Number of Combined Losses/Elements” (e.g., 150).
- (2) A combination of elements is discarded if  $m_{\text{total}} > m_{1+} - m_{\min}$  where  $m_{\text{total}}$  is the total mass of the combination,  $m_{1+}$  is the mass of singly charged precursor ion, and  $m_{\min}$  is the minimum  $m/z$  ratio.
- (3) If a theoretical product ion mass spectrum of a single compound, e.g.,  $C_aH_bN_cO_d$ , is generated, any combination of elements  $C_wH_xN_yO_z$  is limited by the condition  $w \leq a$ ,  $x \leq b$ ,  $y \leq c$ , and  $z \leq d$ . If theoretical spectra of multiple compounds from a database are generated (within a specified precursor  $m/z$  error tolerance), the maximum numbers of elements are used. For example, given another database compound,  $C_eH_fN_gO_h$ , then  $w \leq \max(a, e)$ ,  $x \leq \max(b, f)$ ,  $y \leq \max(c, g)$ , and  $z \leq \max(d, h)$ .

(4) Senior's rules no. 1 and 3 are checked. In this case, the sum of valences of all atoms in a formula had to be even and greater than or equal to  $2 * (n - \alpha)$  where  $\alpha$  was the maximum number of independent molecules of neutral losses. We did not use  $\alpha = 1$  but an empirically determined value  $\alpha = 10$  what means that at the most ten neutral losses could occur simultaneously (i.e., a molecular graph could include up to  $\alpha$  components). The reason was that multiple neutral losses of molecules such as water or ammonia did not meet the criterion  $2 * (n - 1)$ .

(5) The remaining combinations of elements are applied as hypothetical neutral losses to a single molecular formula or a database of molecular formulas. Note that atoms in the formula of an annotated fragment ion form a subset of atoms in the formula of the precursor ion, what is an important difference from the MS<sup>1</sup> approach. Similar to the MS<sup>1</sup> approach, the presence of a monoisotopic peak is checked in the experimental spectrum while the theoretical spectrum is being generated to save the computer's main memory (i.e., unnecessary isotopic patterns of fragment ions are not generated).
